# Supplementary material for: Alterations of microbiota structure in the larynx relevant to laryngeal carcinoma
Source: PubMed Central journal article supplement (PMC5511217; doi:10.1038/s41598-017-05576-7), 2017-07-14
Supplement: 41598_2017_5576_MOESM1_ESM.pdf [file 41598_2017_5576_MOESM1_ESM.pdf]

## **Supplementary Information**

**Title:** Alterations of microbiota structure in the larynx relevant to laryngeal carcinoma

**Authors:** Hongli Gong, Yi Shi, Xiyao Xiao, Pengyu Cao, Chunping Wu, Lei Tao, Dongsheng Hou, Yuezhu Wang, Liang Zhou

**Supplementary tables**

|                | LSCC subjects | Control subjects | <i>p</i>           |
|----------------|---------------|------------------|--------------------|
| Gender         |               |                  |                    |
| male           | 29            | 28               | 0.672 <sup>a</sup> |
| female         | 2             | 4                |                    |
| Age            |               |                  |                    |
| ≤ 60 years     | 11            | 14               | 0.503 <sup>b</sup> |
| > 60 years     | 20            | 18               |                    |
| Smoking        |               |                  |                    |
| never smoking  | 9             | 17               | 0.052 <sup>b</sup> |
| smoking        | 22            | 15               |                    |
| Drinking       |               |                  |                    |
| never drinking | 13            | 20               | 0.102 <sup>b</sup> |
| drinking       | 18            | 12               |                    |
| Tumor type     |               |                  |                    |
| supraglottic   | 11            |                  |                    |
| glottic        | 20            |                  |                    |
| T stages       |               |                  |                    |
| T1 and T2      | 12            |                  |                    |
| T3 and T4      | 19            |                  |                    |

**Table S1. Clinical characteristics of recruited patients in this study.** <sup>a</sup> *p* value was tested from Fisher's Exact test. <sup>b</sup> *p* values were tested from Pearson Chi-Square test

| OTUs | Chao1    | 95% C.I. |          | ACE      | 95% C.I. |          | Simpson | 95% C.I. |         | Shannon | 95% C.I. |       | Coverage | Evenness |
|------|----------|----------|----------|----------|----------|----------|---------|----------|---------|---------|----------|-------|----------|----------|
| 8887 | 13789.29 | 13359.53 | 14260.34 | 15809.74 | 15482.02 | 16153.74 | 0.0043  | 0.00424  | 0.00436 | 6.874   | 6.866    | 6.883 | 0.98     | 0.76     |

**Table S2. Evaluating indices of the 16S rRNA gene libraries at a level of 97% similarity from the pyrosequencing analysis in this study**

|                           | Tumor samples | NATs <sup>a</sup> | Control samples | F <sup>b</sup> | <i>p</i> |
|---------------------------|---------------|-------------------|-----------------|----------------|----------|
| <b>Genera</b>             |               |                   |                 |                |          |
| <i>Streptococcus</i>      | 25.3          | 31.3              | 65.4            | 249.9          | <0.001   |
| <i>Fusobacterium</i>      | 26.7          | 17.9              | 6.9             | 27.0           | <0.001   |
| <i>Prevotella</i>         | 15.5          | 16.8              | 8.4             | 14.8           | <0.001   |
| <i>Parvimonas</i>         | 1.8           | 0.9               | 0.2             | 8.8            | <0.001   |
| <i>Peptostreptococcus</i> | 0.7           | 0.6               | 0.1             | 6.0            | 0.004    |
| <i>Dialister</i>          | 1             | 1                 | 0.2             | 4.9            | 0.01     |
| <i>Treponema</i>          | 0.8           | 0.7               | 0.2             | 4.7            | 0.012    |
| <i>Capnocytophaga</i>     | 2.4           | 0.5               | 0.3             | 4.6            | 0.012    |
| <i>Solobacterium</i>      | 0.3           | 0.7               | 0.2             | 4.6            | 0.012    |
| <i>Porphyrromonas</i>     | 1.4           | 1.3               | 2.6             | 3.6            | 0.031    |

**Table S3. The main bacterial genera contributing to separation among the tumor tissue, the NATs, and the control tissues.** <sup>a</sup> NATs were the normal tissue adjacent tumor sites. <sup>b</sup> F tests were used for descriptive purpose of different genera that contributed to three groups of cluster analyses, and these results were analyzed using means clustering analysis

|                           | LSCC patients (%) <sup>a</sup> | control subjects (%) | F <sup>b</sup> | p      |
|---------------------------|--------------------------------|----------------------|----------------|--------|
| <b>Genera</b>             |                                |                      |                |        |
| <i>Streptococcus</i>      | 25.5                           | 65.4                 | 237.4          | <0.001 |
| <i>Fusobacterium</i>      | 25.8                           | 6.9                  | 51.9           | <0.001 |
| <i>Prevotella</i>         | 17.9                           | 8.4                  | 27.0           | <0.001 |
| <i>Parvimonas</i>         | 1.5                            | 0.2                  | 17.3           | <0.001 |
| <i>Dialister</i>          | 1.1                            | 0.2                  | 10.6           | 0.002  |
| <i>Mogibacterium</i>      | 0.1                            | 0.1                  | 10.1           | 0.003  |
| <i>Solobacterium</i>      | 0.5                            | 0.2                  | 6.7            | 0.013  |
| <i>Treponema</i>          | 0.9                            | 0.2                  | 6.4            | 0.014  |
| <i>Tannerella</i>         | 0.03                           | 0.004                | 6.1            | 0.016  |
| <i>Peptostreptococcus</i> | 0.8                            | 0.1                  | 6.0            | 0.018  |
| <i>Porphyromonas</i>      | 1                              | 2.6                  | 5.3            | 0.026  |
| <i>Mycoplasma</i>         | 1.4                            | 0.1                  | 4.5            | 0.038  |

**Table S4. The main bacterial genera contributing to separation between LSCC patients and control subjects.** <sup>a</sup> LSCC were patients with laryngeal squamous cell. <sup>b</sup> F tests were used for descriptive purpose of different genera that contributed to two groups of cluster analyses, and these results were analyzed using means clustering analysis

|                           | LSCC patients (%) <sup>a</sup> | Control subjects (%) | <i>p</i> <sup>b</sup> |
|---------------------------|--------------------------------|----------------------|-----------------------|
| <b>Phyla</b>              |                                |                      |                       |
| <i>Firmicutes</i>         | 31.0                           | 67.2                 | 0.012                 |
| <i>Fusobacteria</i>       | 27.8                           | 7.1                  | 0.001                 |
| <i>Bacteroidetes</i>      | 21.2                           | 10.1                 | 0.029                 |
| <i>Spirochaetes</i>       | 0.4                            | 0.03                 | <0.001                |
| <b>Genera</b>             |                                |                      |                       |
| <i>Fusobacterium</i>      | 27.9                           | 6.1                  | 0.001                 |
| <i>Prevotella</i>         | 16.9                           | 5.7                  | 0.028                 |
| <i>Streptococcus</i>      | 23.5                           | 70.6                 | 0.003                 |
| <i>Gemella</i>            | 3.4                            | 1.9                  | 0.013                 |
| <i>Parvimonas</i>         | 1.8                            | 0.4                  | 0.002                 |
| <i>Capnocytophaga</i>     | 1.2                            | 0.1                  | 0.019                 |
| <i>Peptostreptococcus</i> | 0.8                            | 0.04                 | 0.004                 |
| <i>Dialister</i>          | 0.8                            | 0.2                  | 0.006                 |
| <i>Solobacterium</i>      | 0.6                            | 0.2                  | 0.042                 |
| <i>Treponema</i>          | 0.4                            | 0.04                 | 0.001                 |

**Table S5. Differences in the bacterial communities between LSCC patients and control subjects whose ages were less than 60 years.** <sup>a</sup> LSCC were patients with laryngeal squamous cell carcinoma. <sup>b</sup> *p* values were calculated using metastats methods

|                        | LSCC patients (%) <sup>a</sup> | control subjects (%) | <i>p</i> <sup>b</sup> |
|------------------------|--------------------------------|----------------------|-----------------------|
| <b>Phyla</b>           |                                |                      |                       |
| <i>Fusobacteria</i>    | 22.0                           | 7.9                  | 0.002                 |
| <i>Firmicutes</i>      | 35.2                           | 60.9                 | 0.018                 |
| <i>Bacteroidetes</i>   | 24.9                           | 14.3                 | 0.022                 |
| <i>Spirochaetes</i>    | 0.9                            | 0.3                  | <0.001                |
| <i>Tenericutes</i>     | 0.9                            | 0.1                  | 0.024                 |
| <b>Genera</b>          |                                |                      |                       |
| <i>Fusobacterium</i>   | 23.8                           | 7.5                  | 0.001                 |
| <i>Prevotella</i>      | 19.2                           | 8.5                  | 0.036                 |
| <i>Streptococcus</i>   | 28.0                           | 61.4                 | 0.008                 |
| <i>Gemella</i>         | 4.9                            | 1.7                  | 0.001                 |
| <i>Capnocytophaga</i>  | 1.7                            | 0.5                  | <0.001                |
| <i>Dialister</i>       | 1.3                            | 0.1                  | 0.002                 |
| <i>Treponema</i>       | 1.2                            | 0.4                  | <0.001                |
| <i>Mycoplasma</i>      | 1.2                            | 0.1                  | 0.024                 |
| <i>Parvimonas</i>      | 1.2                            | 0.1                  | <0.001                |
| <i>Aggregatibacter</i> | 1.1                            | 0.05                 | 0.01                  |
| <i>Solobacterium</i>   | 0.5                            | 0.1                  | 0.004                 |

**Table S6. Differences in the bacterial communities between LSCC patients and control subjects whose ages were more than 60 years.** <sup>a</sup> LSCC were patients with laryngeal squamous cell carcinoma. <sup>b</sup> *p* values were calculated using metastats methods

|                           | LSCC patients (%) <sup>a</sup> | control subjects (%) | <i>p</i> <sup>b</sup> |
|---------------------------|--------------------------------|----------------------|-----------------------|
| <b>Phyla</b>              |                                |                      |                       |
| <i>Fusobacteria</i>       | 31.5                           | 9.8                  | 0.001                 |
| <i>Firmicutes</i>         | 22.2                           | 59.2                 | 0.005                 |
| <i>Actinobacteria</i>     | 0.5                            | 3.8                  | 0.038                 |
| <i>Spirochaetes</i>       | 0.5                            | 0.3                  | <0.001                |
| <b>Genera</b>             |                                |                      |                       |
| <i>Fusobacterium</i>      | 34.0                           | 9.1                  | <0.001                |
| <i>Prevotella</i>         | 18.8                           | 8.1                  | 0.029                 |
| <i>Streptococcus</i>      | 14.7                           | 60.3                 | 0.003                 |
| <i>Gemella</i>            | 2.8                            | 1.8                  | 0.01                  |
| <i>Parvimonas</i>         | 2.4                            | 0.3                  | <0.001                |
| <i>Capnocytophaga</i>     | 1.0                            | 0.3                  | 0.011                 |
| <i>Dialister</i>          | 1.0                            | 0.2                  | 0.006                 |
| <i>Peptostreptococcus</i> | 0.7                            | 0.2                  | 0.031                 |
| <i>Aggregatibacter</i>    | 0.7                            | 0.04                 | 0.008                 |
| <i>Treponema</i>          | 0.6                            | 0.3                  | 0.001                 |
| <i>Solobacterium</i>      | 0.4                            | 0.1                  | 0.004                 |
| <i>Staphylococcus</i>     | 0.3                            | 0.01                 | 0.006                 |

**Table S7. Differences in the bacterial communities between LSCC patients and control subjects who did not drinking alcohol.** <sup>a</sup> LSCC were patients with laryngeal squamous cell carcinoma. <sup>b</sup> *p* values were calculated using metastats methods



|                       | LSCC patients (%) <sup>a</sup> | control subjects | <i>p</i> <sup>b</sup> |
|-----------------------|--------------------------------|------------------|-----------------------|
| <b>Phyla</b>          |                                |                  |                       |
| <i>Fusobacteria</i>   | 17.8                           | 3.8              | 0.007                 |
| <i>Firmicutes</i>     | 41.0                           | 71.1             | 0.04                  |
| <i>Bacteroidetes</i>  | 23.5                           | 7.4              | 0.006                 |
| <i>Spirochaetes</i>   | 0.9                            | 0.03             | 0.004                 |
| <b>Genera</b>         |                                |                  |                       |
| <i>Fusobacterium</i>  | 17.7                           | 3.2              | 0.004                 |
| <i>Prevotella</i>     | 19.0                           | 7.9              | 0.035                 |
| <i>Streptococcus</i>  | 33.6                           | 74.0             | 0.006                 |
| <i>Gemella</i>        | 5.7                            | 1.5              | 0.002                 |
| <i>Capnocytophaga</i> | 1.9                            | 0.3              | 0.014                 |
| <i>Treponema</i>      | 1.1                            | 0.04             | 0.003                 |
| <i>Parvimonas</i>     | 0.7                            | 0.05             | 0.003                 |
| <i>Campylobacter</i>  | 0.2                            | 0.02             | 0.043                 |

**Table S8. Differences in the bacterial communities between LSCC patients and control subjects who drank alcohol.** <sup>a</sup> LSCC were patients with laryngeal squamous cell carcinoma. <sup>b</sup> *p* values were calculated using metastats methods

|                       | LSCC patients (%) <sup>a</sup> | Control subjects | <i>p</i> <sup>b</sup> |
|-----------------------|--------------------------------|------------------|-----------------------|
| Phyla                 |                                |                  |                       |
| <i>Fusobacteria</i>   | 27.0                           | 9.4              | 0.008                 |
| <i>Firmicutes</i>     | 24.0                           | 58.7             | 0.007                 |
| Genera                |                                |                  |                       |
| <i>Fusobacterium</i>  | 28.9                           | 8.7              | 0.006                 |
| <i>Prevotella</i>     | 25.7                           | 9.6              | 0.02                  |
| <i>Streptococcus</i>  | 17.5                           | 60.3             | 0.045                 |
| <i>Parvimonas</i>     | 1.5                            | 0.4              | 0.002                 |
| <i>Capnocytophaga</i> | 1.4                            | 0.4              | 0.031                 |
| <i>Dialister</i>      | 1.2                            | 0.3              | 0.005                 |
| <i>Solobacterium</i>  | 0.5                            | 0.1              | 0.016                 |

**Table S9. Differences in the bacterial communities between LSCC patients and control subjects who did not smoke.** <sup>a</sup> LSCC were patients with laryngeal squamous cell carcinoma. <sup>b</sup> *p* values were calculated using metastats methods

|                           | LSCC patients (%) <sup>a</sup> | control subjects | pb     |
|---------------------------|--------------------------------|------------------|--------|
| <b>Phyla</b>              |                                |                  |        |
| <i>Fusobacteria</i>       | 23.1                           | 5.5              | 0.001  |
| <i>Firmicutes</i>         | 37.7                           | 69.3             | 0.003  |
| <i>Bacteroidetes</i>      | 17.4                           | 8.4              | 0.01   |
| <i>Spirochaetes</i>       | 0.9                            | 0.02             | <0.001 |
| <b>Genera</b>             |                                |                  |        |
| <i>Fusobacterium</i>      | 23.3                           | 4.8              | <0.001 |
| <i>Prevotella</i>         | 14.3                           | 7.2              | 0.042  |
| <i>Streptococcus</i>      | 28.6                           | 71.2             | <0.001 |
| <i>Gemella</i>            | 5.9                            | 1.3              | 0.001  |
| <i>Capnocytophaga</i>     | 1.7                            | 0.2              | 0.002  |
| <i>Parvimonas</i>         | 1.5                            | 0.06             | <0.001 |
| <i>Porphyromonas</i>      | 1.1                            | 0.4              | 0.016  |
| <i>Aggregatibacter</i>    | 1.3                            | 0.03             | 0.001  |
| <i>Treponema</i>          | 1.1                            | 0.03             | <0.001 |
| <i>Peptostreptococcus</i> | 0.9                            | 0.09             | 0.002  |
| <i>Solobacterium</i>      | 0.6                            | 0.2              | 0.032  |
| <i>Selenomonas</i>        | 0.3                            | 0.01             | 0.009  |
| <i>Campylobacter</i>      | 0.2                            | 0.04             | 0.013  |

**Table S10. Differences in the bacterial communities between LSCC patients and control subjects who smoked.** <sup>a</sup> LSCC were patients with laryngeal squamous cell carcinoma. <sup>b</sup> *p* values were calculated using metastats methods

|                           | LSCC patients (%) <sup>a</sup> | control subjects | $p^b$  |
|---------------------------|--------------------------------|------------------|--------|
| <b>Phyla</b>              |                                |                  |        |
| <i>Fusobacteria</i>       | 25.8                           | 5.3              | <0.001 |
| <i>Firmicutes</i>         | 30.8                           | 66.8             | <0.001 |
| <i>Bacteroidetes</i>      | 22.7                           | 11.5             | 0.001  |
| <i>Spirochaetes</i>       | 0.7                            | 0.1              | <0.001 |
| <i>Cyanobacteria</i>      | 0.4                            | 0.03             | 0.049  |
| <b>Genera</b>             |                                |                  |        |
| <i>Fusobacterium</i>      | 27.1                           | 4.6              | <0.001 |
| <i>Prevotella</i>         | 17.4                           | 7.1              | 0.002  |
| <i>Streptococcus</i>      | 23.0                           | 69.9             | <0.001 |
| <i>Gemella</i>            | 4.5                            | 1.6              | <0.001 |
| <i>Parvimonas</i>         | 1.6                            | 0.1              | <0.001 |
| <i>Mycoplasma</i>         | 1.3                            | 0.01             | 0.007  |
| <i>Dialister</i>          | 1.2                            | 0.08             | <0.001 |
| <i>Treponema</i>          | 0.9                            | 0.1              | <0.001 |
| <i>Peptostreptococcus</i> | 0.8                            | 0.07             | <0.001 |
| <i>Solobacterium</i>      | 0.6                            | 0.1              | 0.001  |
| <i>Aggregatibacter</i>    | 0.6                            | 0.03             | 0.006  |
| <i>Streptophyta</i>       | 0.4                            | 0.02             | 0.016  |
| <i>Selenomonas</i>        | 0.3                            | 0.05             | 0.001  |
| <i>Campylobacter</i>      | 0.2                            | 0.4              | 0.025  |
| <i>Serratia</i>           | 0.2                            | 0.03             | 0.031  |
| <i>Staphylococcus</i>     | 0.2                            | 0.01             | 0.005  |

**Table S11. Differences in the bacterial communities between LSCC patients and control subjects who were males.** <sup>a</sup> LSCC were patients with laryngeal squamous cell carcinoma. <sup>b</sup>  $p$  values were calculated using metastats methods

|                       | LSCC patients (%) <sup>a</sup> | Control subjects (%) | <i>p</i> <sup>b</sup> |
|-----------------------|--------------------------------|----------------------|-----------------------|
| Genera                |                                |                      |                       |
| <i>Capnocytophaga</i> | 3.9                            | 0.01                 | 0.049                 |
| <i>Haemophilus</i>    | 0.7                            | 0.04                 | 0.049                 |

**Table S12. Differences in the bacterial communities between LSCC patients and control subjects who were females.** <sup>a</sup> LSCC were patients with laryngeal squamous cell carcinoma. <sup>b</sup> *p* values were calculated using metastats methods

Supplementary figures

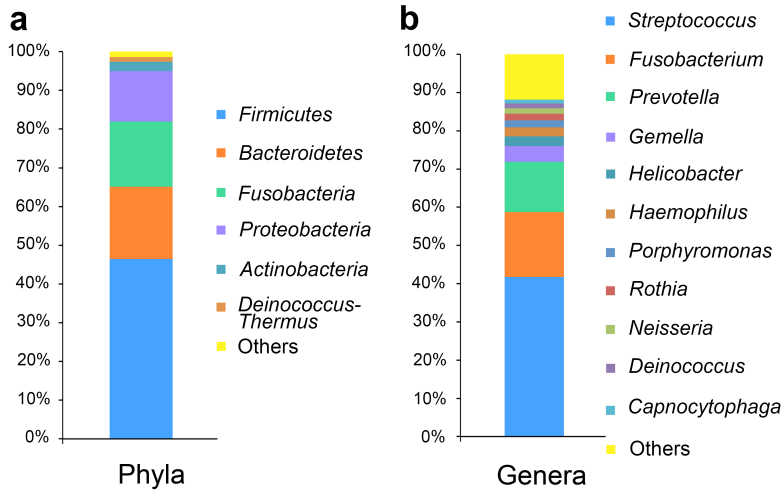

**Figure S1. Abundances of dominant bacterial communities in the larynx.** (a) Abundances (% of total 16S rRNA sequences) of the predominant bacterial phyla in the laryngeal mucosa of 63 subjects (including 31 tumor samples, 24 normal tissues adjacent to the tumor sites, and 32 control samples). (b) Main bacterial genera in the laryngeal mucosa of 63 subjects.

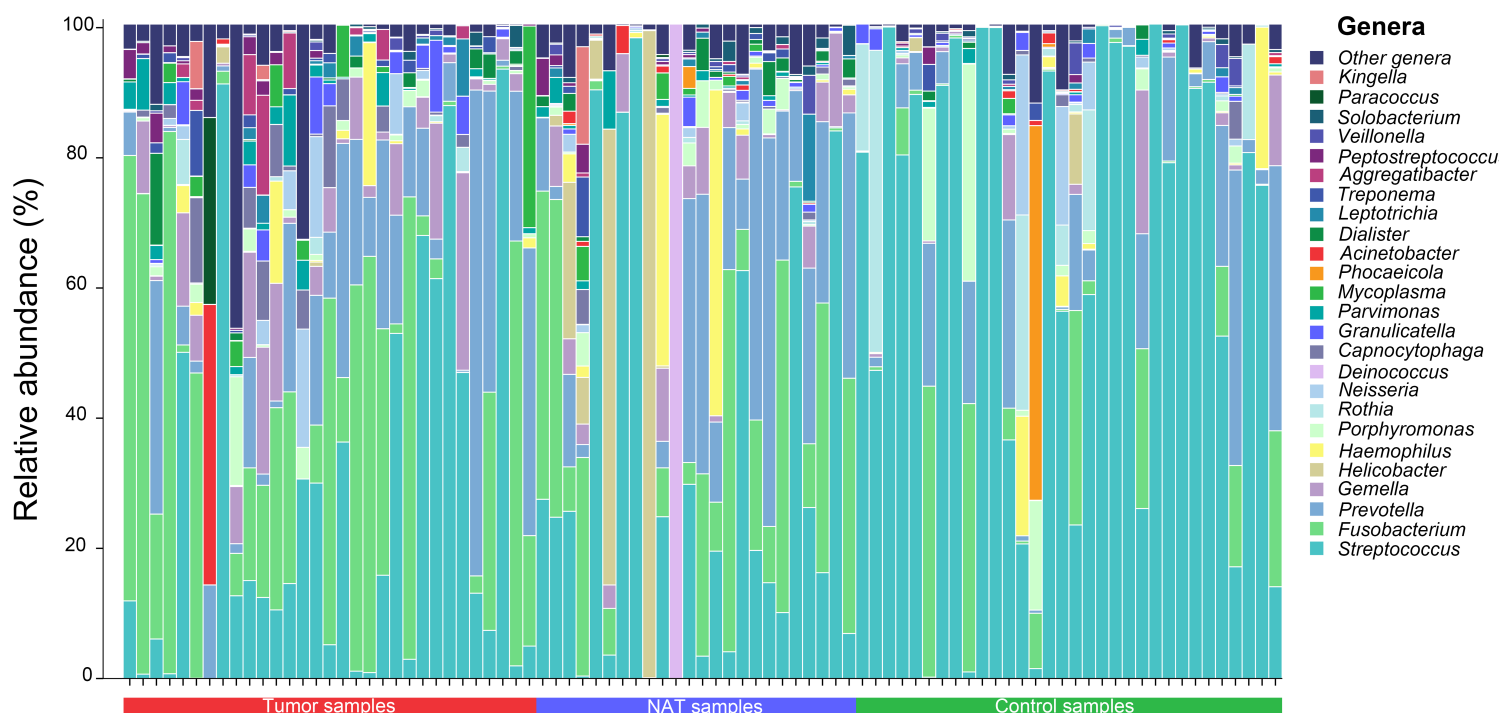

**Figure S2. Distributions of the predominant bacterial genera at the laryngeal sites.** The stacked columns for each of the tissue samples indicate the relative abundance distributions of the 25 main genera from three groups of samples. The red bar at the bottom of the legend indicates the tumor tissue samples. The blue bar indicates the normal tissues adjacent to the tumor sites (NATs) samples. The green bar indicates vocal cord polyps samples. The bars on the right of the legend indicate the main bacterial genera.

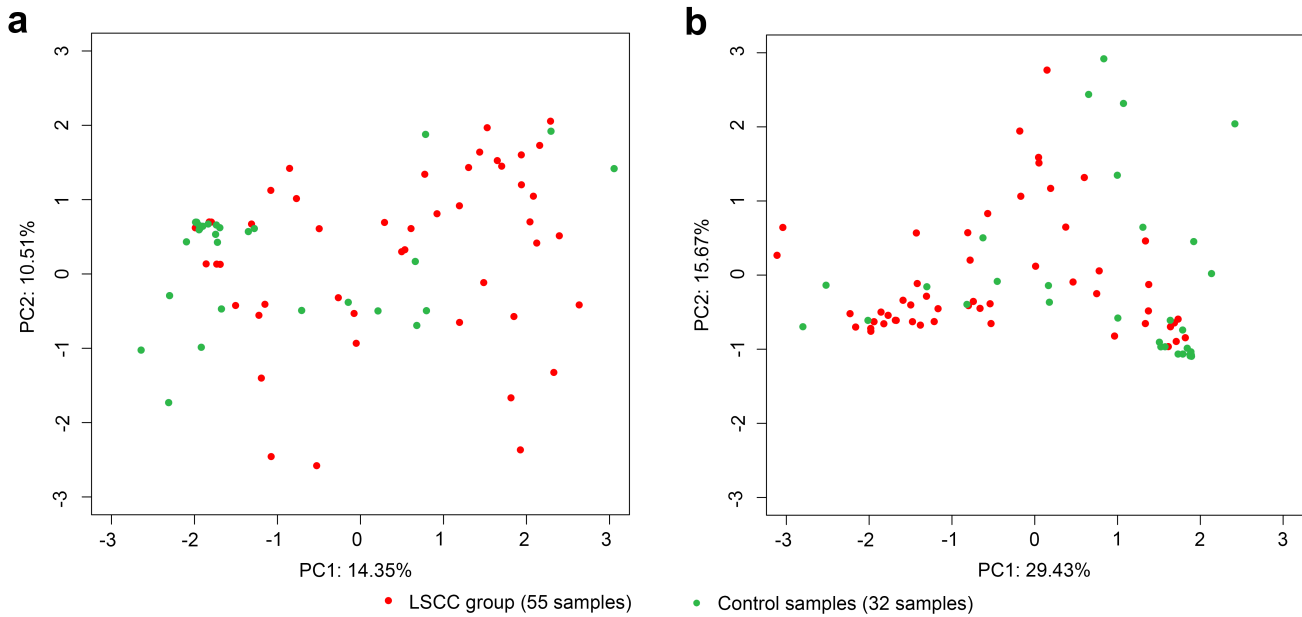

**Figure S3. Comparative analyses of the bacterial communities in LSCC samples and the control samples.** Principal component analysis (PCA) based on the weighted UniFrac distance were used to analyze the bacterial genera (a) and bacterial phyla (b) membership metrics of the LSCC group (including 31 tumor samples and 24 normal tissues adjacent to the tumor sites (NATs)) and control samples (32 control samples). The red point at the bottom of the figure indicated the LSCC patients, and the green point indicated the control subjects. The statistical significance ( $p$  value) was analyzed using the R package CrossMatch based on the UniFrac sample distance. LSCC, laryngeal squamous cell carcinoma.



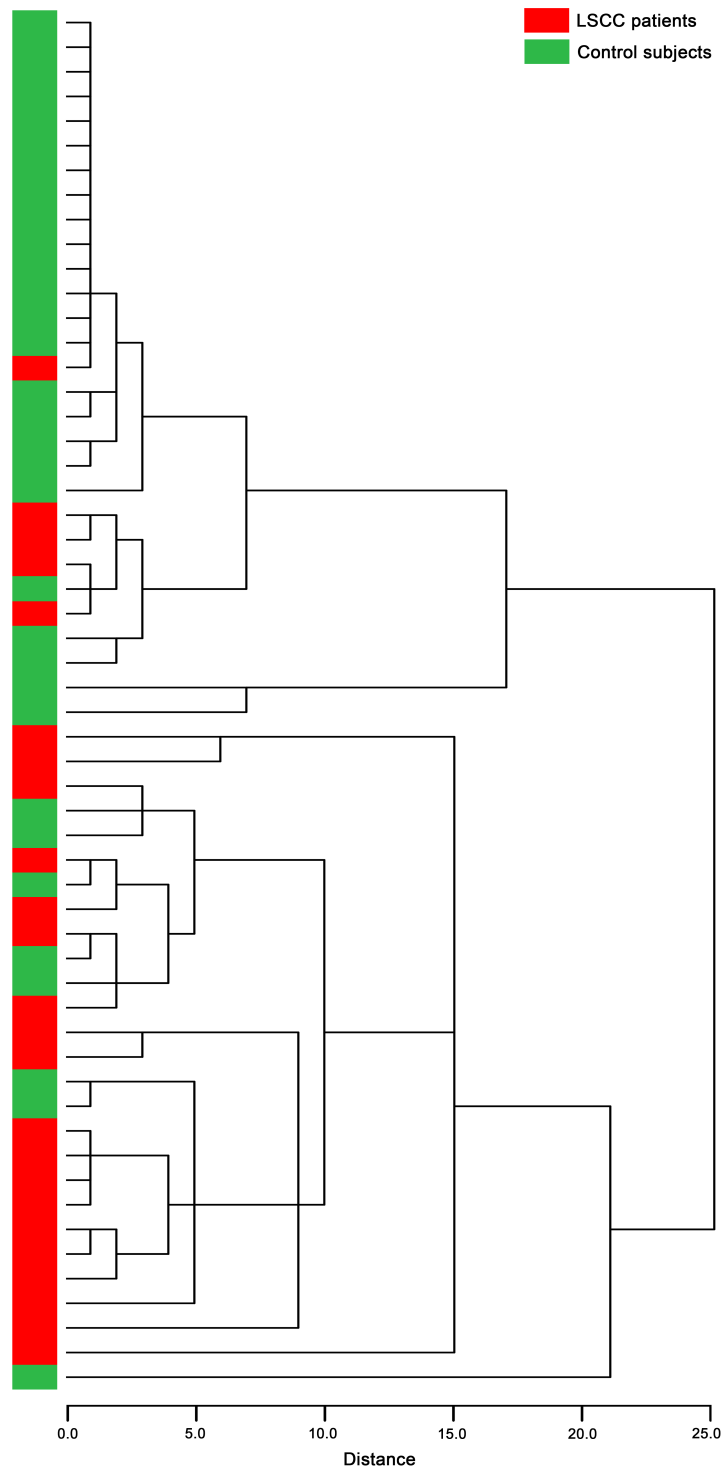

**Figure S4. Hierarchical clustering of two groups of sample profiles.** Visualization of similarities between LSCC patients (24 LSCC samples) and control subjects (32 control samples) by hierarchical clustering analysis with the average linkage method and based on the Squared Euclidean distances. Samples from the control subjects were separated from those of LSCC patients. The scale bar indicated a weighted distance from 0 to 25. The red bar at the top-right of the figure indicated the LSCC patients, and the green bar indicated the control subjects.
